# Supplementary material
Source: PubMed Central journal article supplement (PMC2529095)
Supplement: 0804220105_0804220105SI.pdf [file 0804220105_0804220105SI.pdf]

# Supporting Information

Coyne *et al.* 10.1073/pnas.0804220105

## SI Materials and Methods

**Assessment of *in Vitro* Growth Under Various Conditions.** The bile salt mixture was an ~ 50:50 mix of sodium cholate and sodium deoxycholate. The conjugated bile salts were in the form of porcine bile extract. The porcine bile extract, hexadecyltrimethylammonium bromide, benzalkonium chloride, and deoxycholic acid were purchased from Sigma-Aldrich Co. Basal medium was prepared, autoclaved, and supplemented as usual, but at 2× concentration. Appropriate amounts of the additives to be tested were dissolved in this medium, and the final volume was adjusted with sterile water. Serial 2-fold dilutions were made with 1× supplemented basal medium to produce a range of concentrations for testing, and the aliquots were filter sterilized. Strains to be tested were grown overnight in basal medium, and these cultures were used to inoculate the anaerobic test medium. Primary growth in the test medium was assessed after incubation anaerobically overnight at 37°C.

Vigorously resuspended overnight cultures of the strains to be compared for growth rate were used to inoculate anaerobic basal medium in 16 × 100-mm screw-capped tubes. Growth was monitored by recording absorbance at 600 nm every hour using a Genesys 20 spectrophotometer (Thermo Electron Corp.). The readings for several replicate cultures were averaged and plotted to arrive at an accurate assessment of growth rate.

Sensitivity to acid pH was assessed by inoculating pH-adjusted basal medium or pH-adjusted normal saline with growth from overnight basal-medium cultures. Samples were removed from the normal saline cultures after exposure to acid conditions for 2, 4, 6, and 24 h and were used to inoculate the anaerobic basal medium. Growth of these postexposure cultures was assessed after overnight anaerobic incubation.

**Gene Expression Analysis.** Triplicate cultures of *B. fragilis* 9343 wild type and  $\Delta ungD1\Delta ungD2\Delta PSH$  were grown overnight, diluted 1:100 into fresh supplemented basal medium, and allowed to reach mid-log phase ( $OD_{600} \sim 0.8$ ). Total RNA was extracted from each culture using the RNeasy Mini Kit and RNAprotect reagent (Qiagen) according to the manufacturer's instructions. The RNA samples were subjected to on-column DNase digestion using the RNase-free DNase kit (Qiagen) as suggested. RNA quality and concentration was determined using an Agilent 2100 bioanalyzer at the Harvard Medical School-Partners Healthcare Center for Genetics and Genomics (Cambridge, MA).

For gene expression analysis, high-density oligonucleotide microarrays (14 24-mer primer pairs per gene, 3-fold technical redundancy per chip, using design 2005-08-12\_B\_fragili\_24mer) were purchased from NimbleGen Systems. Array synthesis, Cy3 labeling, hybridization, and array scanning were performed by NimbleGen (Roche NimbleGen). Data extraction, background correction, quantile normalization (1), and RMA analysis (2) were performed using the NimbleScan software package, version 2.4.27.

The normalized, 3-per-gene replicate expression levels for each chip were averaged to reduce the data set to 1 expression level per gene per chip. These averaged data were log 2 transformed and analyzed by 1000 permutations of rank products (3), using a custom Perl script based on the Perl implementation of the rank products procedure as provided by the Bioinformatics Research Centre at the University of Glasgow. A fold-change score also was assigned to each gene by computing the ratio of the average of the 3 mutant expression values to the average of the 3 wild-type expression values. A gene was considered differentially expressed if its false discovery rate as calculated by rank products was  $\leq 0.05$  and if its fold-change ratio satisfied  $0.5 \leq x \leq 2.0$ .

1. Bolstad B, Irizarry R, Astrand M, Speed T. (2003) A comparison of normalization methods for high density oligonucleotide array data based on bias and variance. *Bioinformatics* 19(2):185–193.
2. Irizarry RA, *et al.* (2003) Exploration, normalization, and summaries of high density oligonucleotide array probe level data. *Biostatistics* 4(2):249–264.
3. Breitling R, Armengaud P, Amtmann A, Herzyk P. (2004) Rank products: A simple, yet powerful, new method to detect differentially regulated genes in replicated microarray experiments. *FEBS Lett* 573:83–92.
4. Tatusov RL, Koonin EV, Lipman DJ (1997) A genomic perspective on protein families. *Science* 278:631–637.

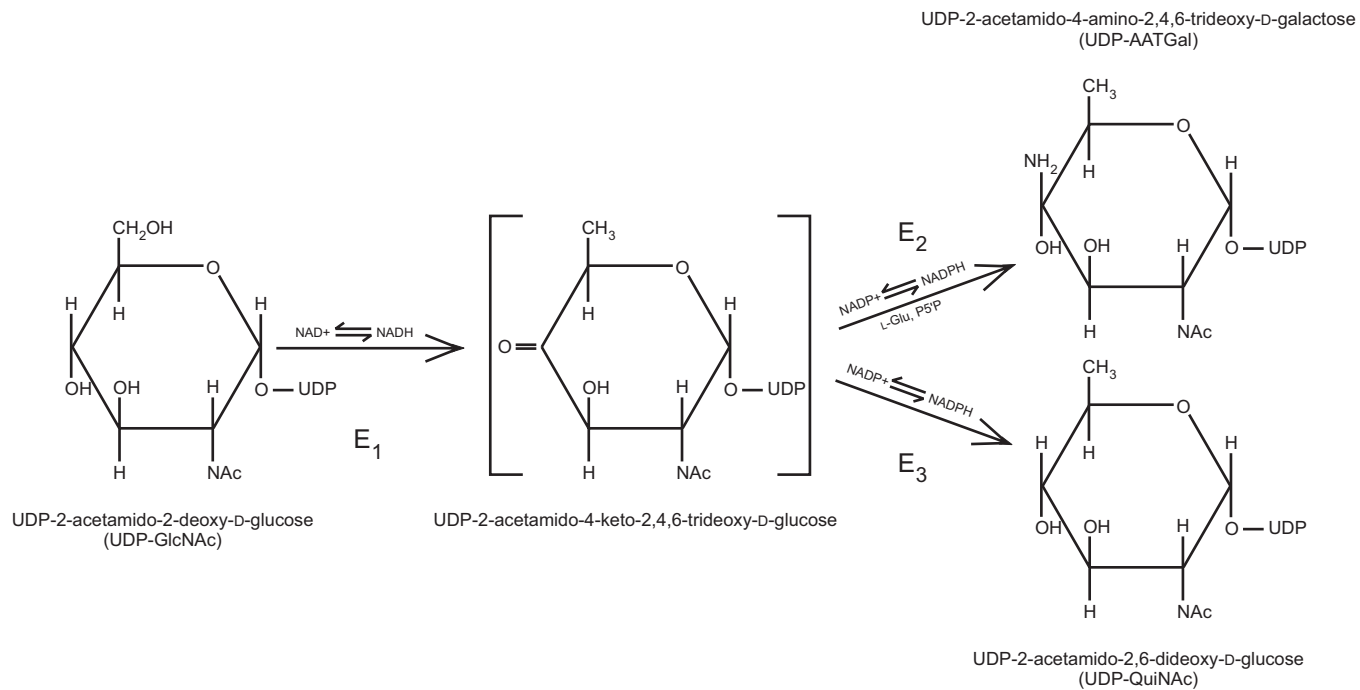

**Fig. S1.** Proposed involvement of UngD2 (E1, UDP-2-acetamido-2-deoxy-D-glucose 4,6-dehydratase) in the formation of a UDP-2-acetamido-4-keto-2,4,6-trideoxy-D-glucose intermediate, with subsequent formation of UDP-2-acetamido-4-amino-2,4,6-trideoxy-D-galactose or UDP-2-acetamido-2,6-dideoxy-D-glucose by the actions of an aminotransferase (E2) or a 4-reductase (E3), respectively. In the pyroxidal-5'-phosphate (P5'P)-dependant aminotransferase reaction, L-glutamate (L-Glu) is converted by oxidative deamination to  $\alpha$ -ketoglutarate.

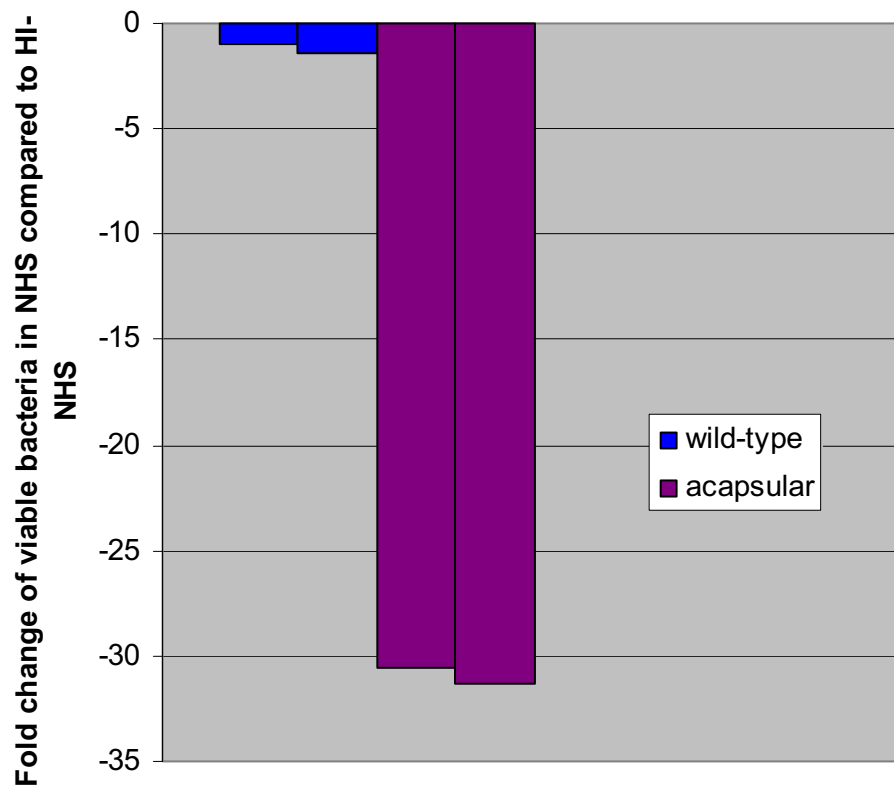

**Fig. S2.** Complement-mediated killing of wild-type *B. fragilis* and the  $\Delta ungD1\Delta ungD2\Delta PSH$  acapsular mutant. The viability of bacteria incubated for 1 h in 10% normal human serum (NHS) was compared with bacteria incubated for 1 h in heat-inactivated normal human serum (HI-NHS), and the results are reported as fold change of viable bacteria. The results of 2 separate experiments are shown for each strain.

**Table S1. Distribution among cluster of orthologous group (COG) categories of *B. fragilis*  $\Delta$ ungD1 $\Delta$ ungD2 $\Delta$ PSH genes with altered expression levels relative to *B. fragilis* 9343/**

| COG | Function                                                     | 9343 genome<br>(4231 genes) | Differentially expressed* |                    |
|-----|--------------------------------------------------------------|-----------------------------|---------------------------|--------------------|
|     |                                                              |                             | Up<br>(62 genes)          | Down<br>(29 genes) |
| J   | Translation                                                  | 171                         | 1                         | 0                  |
| A   | RNA processing and modification                              | 0                           | 0                         | 0                  |
| K   | Transcription                                                | 239                         | 2                         | 0                  |
| L   | Replication, recombination and repair                        | 204                         | 2                         | 0                  |
| B   | Chromatin structure and dynamics                             | 1                           | 0                         | 0                  |
| D   | Cell cycle control, mitosis and meiosis                      | 28                          | 0                         | 0                  |
| Y   | Nuclear structure                                            | 0                           | 0                         | 0                  |
| V   | Defense mechanisms                                           | 116                         | 0                         | 0                  |
| T   | Signal transduction mechanisms                               | 197                         | 0                         | 0                  |
| M   | Cell wall/membrane biogenesis                                | 338                         | 6                         | 7                  |
| N   | Cell motility                                                | 2                           | 0                         | 0                  |
| Z   | Cytoskeleton                                                 | 0                           | 0                         | 0                  |
| W   | Extracellular structures                                     | 0                           | 0                         | 0                  |
| U   | Intracellular trafficking and secretion                      | 72                          | 3                         | 0                  |
| O   | Posttranslational modification, protein turnover, chaperones | 104                         | 1                         | 0                  |
| C   | Energy production and conversion                             | 178                         | 3                         | 0                  |
| G   | Carbohydrate transport and metabolism                        | 262                         | 1                         | 2                  |
| E   | Amino acid transport and metabolism                          | 243                         | 5                         | 0                  |
| F   | Nucleotide transport and metabolism                          | 74                          | 0                         | 0                  |
| H   | Coenzyme transport and metabolism                            | 139                         | 1                         | 0                  |
| I   | Lipid transport and metabolism                               | 74                          | 1                         | 0                  |
| P   | Inorganic ion transport and metabolism                       | 281                         | 0                         | 0                  |
| Q   | Secondary metabolites biosynthesis, transport and catabolism | 35                          | 1                         | 0                  |
| R   | General function prediction only                             | 426                         | 6                         | 1                  |
| S   | Function unknown                                             | 195                         | 2                         | 0                  |
| -   | Not in COGs                                                  | 1463                        | 32                        | 21                 |

\*Genes whose expression level in  $\Delta$ ungD1 $\Delta$ ungD2 $\Delta$ PSH was greater (up column) or less than (down column) that in wild type with a false discovery rate  $\leq$  0.05 and an average fold-change of  $\leq$  0.5 or  $\geq$  2.0.

**Table S2. List of genes with differential expression levels in  $\Delta$ ungD1 $\Delta$ ungD2 $\Delta$ PSH compared with wild type**

| Gene                                                                                                            | Characterization                                                          |
|-----------------------------------------------------------------------------------------------------------------|---------------------------------------------------------------------------|
| Differentially expressed up                                                                                     |                                                                           |
| COG category J (function: translation) (total in category: 1)                                                   |                                                                           |
| BF1923                                                                                                          | hypothetical protein                                                      |
| COG category K (function: transcription) (total in category: 2)                                                 |                                                                           |
| BF0581                                                                                                          | putative AraC family transcriptional regulatory protein                   |
| BF2332                                                                                                          | hypothetical protein                                                      |
| COG category L (function: replication, recombination and repair) (total in category: 2)                         |                                                                           |
| BF4220                                                                                                          | putative histone-like DNA-binding protein HU3                             |
| BF4226                                                                                                          | putative histone-like DNA-binding protein HU4                             |
| COG category M (function: cell wall/membrane biogenesis) (total in category: 6)                                 |                                                                           |
| BF1988                                                                                                          | putative outer membrane protein                                           |
| BF3193                                                                                                          | putative lipoprotein                                                      |
| BF3451                                                                                                          | putative LPS biosynthesis related conserved hypothetical protein          |
| BF3452                                                                                                          | putative LPS biosynthesis related dTDP-4-dehydrorhamnose 3,5-epimerase    |
| BF3453                                                                                                          | putative LPS biosynthesis related glucose-1-phosphate thymidyltransferase |
| BF3944                                                                                                          | putative TonB-family outer membrane receptor protein                      |
| COG category U (function: intracellular trafficking and secretion) (total in category: 3)                       |                                                                           |
| BF3945                                                                                                          | hypothetical protein                                                      |
| BF3946                                                                                                          | hypothetical protein                                                      |
| BF3947                                                                                                          | putative transmembrane MotA/TolQ/ExbB proton channel family protein       |
| COG category O (function: posttranslational modification, protein turnover, chaperones) (total in category: 1)  |                                                                           |
| BF1279                                                                                                          | putative thioredoxin                                                      |
| COG category C (function: energy production and conversion) (total in category: 3)                              |                                                                           |
| BF1279                                                                                                          | putative thioredoxin                                                      |
| BF2351                                                                                                          | succinyl-CoA synthetase beta chain                                        |
| BF3462                                                                                                          | hypothetical protein                                                      |
| COG category G (function: carbohydrate transport and metabolism) (total in category: 1)                         |                                                                           |
| BF3451                                                                                                          | putative LPS biosynthesis related conserved hypothetical protein          |
| COG category E (function: amino acid transport and metabolism) (total in category: 5)                           |                                                                           |
| BF0393                                                                                                          | putative glutamate decarboxylase                                          |
| BF0394                                                                                                          | glutaminase                                                               |
| BF2073                                                                                                          | putative D-3-phosphoglycerate dehydrogenase                               |
| BF2665                                                                                                          | diaminopimelate epimerase                                                 |
| BF2666                                                                                                          | L,L-diaminopimelate aminotransferase                                      |
| COG category H (function: coenzyme transport and metabolism) (total in category: 1)                             |                                                                           |
| BF2073                                                                                                          | putative D-3-phosphoglycerate dehydrogenase                               |
| COG category I (function: lipid transport and metabolism) (total in category: 1)                                |                                                                           |
| BF3320                                                                                                          | putative 7-alpha-hydroxysteroid dehydrogenase (bile acid catabolism)      |
| COG category Q (function: secondary metabolites biosynthesis, transport, and catabolism) (total in category: 1) |                                                                           |
| BF3320                                                                                                          | putative 7-alpha-hydroxysteroid dehydrogenase (bile acid catabolism)      |
| COG category R (general function prediction only) (total in category: 6)                                        |                                                                           |
| BF2334                                                                                                          | hypothetical protein                                                      |
| BF3032                                                                                                          | putative Pirin-like protein                                               |
| BF3271                                                                                                          | putative bacterioferritin-related protein                                 |
| BF3320                                                                                                          | putative 7-alpha-hydroxysteroid dehydrogenase (bile acid catabolism)      |
| BF3463                                                                                                          | putative LPS biosynthesis related polysaccharide transporter              |
| BF3942                                                                                                          | putative TPR-repeat family protein                                        |
| COG category S (function unknown) (total in category: 2)                                                        |                                                                           |

*(Table continues)*

| Gene                                                                                    | Characterization                                      |
|-----------------------------------------------------------------------------------------|-------------------------------------------------------|
| BF2074                                                                                  | hypothetical protein                                  |
| BF3461                                                                                  | hypothetical protein                                  |
| Total genes represented once or more: 35                                                |                                                       |
| Ups not in COGs (total in category: 32)                                                 |                                                       |
| BF0322                                                                                  | hypothetical membrane protein                         |
| BF0468                                                                                  | hypothetical protein                                  |
| BF0470                                                                                  | hypothetical protein                                  |
| BF0567                                                                                  | hypothetical protein                                  |
| BF1047                                                                                  | hypothetical protein                                  |
| BF1158                                                                                  | putative alpha-glucosidase                            |
| BF1567                                                                                  | hypothetical protein                                  |
| BF1629                                                                                  | hypothetical protein                                  |
| BF1639                                                                                  | hypothetical protein                                  |
| BF1733                                                                                  | hypothetical protein                                  |
| BF2113                                                                                  | hypothetical protein                                  |
| BF2162                                                                                  | hypothetical protein                                  |
| BF2168                                                                                  | hypothetical protein                                  |
| BF2257                                                                                  | hypothetical protein                                  |
| BF2347                                                                                  | hypothetical protein                                  |
| BF2349                                                                                  | hypothetical protein                                  |
| BF2377                                                                                  | hypothetical protein                                  |
| BF2441                                                                                  | hypothetical protein                                  |
| BF2442                                                                                  | hypothetical protein                                  |
| BF2443                                                                                  | hypothetical protein                                  |
| BF2445                                                                                  | hypothetical protein                                  |
| BF2496                                                                                  | putative DNA-binding protein                          |
| BF2582                                                                                  | hypothetical protein                                  |
| BF2690                                                                                  | hypothetical protein                                  |
| BF2912                                                                                  | hypothetical protein                                  |
| BF2957                                                                                  | hypothetical protein                                  |
| BF3394                                                                                  | hypothetical protein                                  |
| BF3460                                                                                  | putative LPS biosynthesis related glycosyltransferase |
| BF3789                                                                                  | hypothetical protein                                  |
| BF3930                                                                                  | hypothetical protein                                  |
| BF4230                                                                                  | hypothetical protein                                  |
| pBF9343.11                                                                              | putative integral membrane protein                    |
| Differentially expressed down                                                           |                                                       |
| COG category M (function: cell wall/membrane biogenesis) (total in category: 7)         |                                                       |
| BF1551                                                                                  | putative glucose-1-phosphate thymidyl transferase     |
| BF1552                                                                                  | putative dTDP-4-dehydrorhamnose 3,5 epimerase         |
| BF1554                                                                                  | putative nucleotide-sugar dehydrogenase               |
| BF1555                                                                                  | putative dNTP-hexose dehydratase-epimerase            |
| BF1557                                                                                  | putative glycosyltransferase                          |
| BF1560                                                                                  | putative glycosyltransferase                          |
| BF2848                                                                                  | putative capsular polysaccharide biosynthesis protein |
| COG category G (function: carbohydrate transport and metabolism) (total in category: 2) |                                                       |
| BF1555                                                                                  | putative dNTP-hexose dehydratase-epimerase            |
| BF2848                                                                                  | putative capsular polysaccharide biosynthesis protein |
| COG category R (general function prediction only) (total in category: 1)                |                                                       |
| BF1556                                                                                  | putative polysaccharide transporter/flippase          |
| Total genes represented once or more: 10                                                |                                                       |
| Downs not in COGs (total in category: 21)                                               |                                                       |
| BF0230                                                                                  | hypothetical protein                                  |
| BF0888                                                                                  | hypothetical protein                                  |
| BF1260                                                                                  | hypothetical protein                                  |
| BF1324                                                                                  | hypothetical protein                                  |
| BF1355                                                                                  | hypothetical protein                                  |
| BF1549                                                                                  | putative transcriptional regulator                    |
| BF1550                                                                                  | putative transcriptional regulator                    |
| BF1553                                                                                  | hypothetical protein                                  |
| BF1558                                                                                  | putative glycosyltransferase protein                  |
| BF1559                                                                                  | hypothetical protein                                  |
| BF2347B                                                                                 | hypothetical protein                                  |

| Gene   | Characterization               |
|--------|--------------------------------|
| BF2995 | hypothetical protein           |
| BF2999 | hypothetical protein           |
| BF3000 | hypothetical protein           |
| BF3001 | hypothetical protein           |
| BF3002 | hypothetical protein           |
| BF3003 | putative lipoprotein           |
| BF3004 | hypothetical protein           |
| BF3427 | hypothetical protein           |
| BF3742 | hypothetical protein           |
| BF3949 | putative transmembrane protein |

Abbreviations: COG, cluster of orthologous groups.

**Table S3. Primers used in this study**

| Primer sequence (5'→3')        | 5' addition                  | Purpose                                |
|--------------------------------|------------------------------|----------------------------------------|
| ATTCCGAAAGCATTGAAGTCTAA        | AA GAGCTC ( <i>Sst</i> I)    | Delete <i>ungD1</i> , upstream flank   |
| GCAACTCGCGATGAAAGATACTTA       | AT CTGCAG ( <i>Pst</i> I)    |                                        |
| TTTGTAAGCAAGAATTCGGAGTTT       | TT CTGCAG ( <i>Pst</i> I)    | Delete <i>ungD1</i> , downstream flank |
| AATCCTGATCACCTCCTACAAGAA       | AA GAGCTC ( <i>Sst</i> I)    |                                        |
| AGAGGTTCAAAGAACAGACGATG        | GT GGATCC ( <i>Bam</i> HI)   | Delete <i>ungD2</i> , upstream flank   |
| AGTACCTTCGCAGAAAAGATACCG       | GC GAATTC ( <i>Eco</i> RI)   |                                        |
| GTGAGCAAAAACCTCTTGTGAG         | GA GAATTC ( <i>Eco</i> RI)   | Delete <i>ungD2</i> , downstream flank |
| AAATATCAACCACCTCCGTCAGTT       | TT GGATCC ( <i>Bam</i> HI)   |                                        |
| CGTTGAAACTAGCATCTCGTACTC       | CTCA GGATCC ( <i>Bam</i> HI) | Delete PSH, upstream flank             |
| TTATGAAGTTTAAAGGGTCAAGC        | CGAA ACGCGT ( <i>Mlu</i> I)  |                                        |
| TGCAAAGAAAAGATGTCCATTA         | AAAT ACGCGT ( <i>Mlu</i> I)  | Delete PSH, downstream flank           |
| CTTTCAGAAAAGAAAAGCATTCC        | CCTT GGATCC ( <i>Bam</i> HI) |                                        |
| TGAAATGTTTATAAAAATAAAAGGTTAGGG | TA GGATCC ( <i>Bam</i> HI)   | Clone <i>ungD1</i>                     |
| CATTTATTCATTCCTAAGTTTTCG       | GC GGATCC ( <i>Bam</i> HI)   |                                        |
| ACCGCCTAAAACAAAACACTGTAAA      | AA GGATCC ( <i>Bam</i> HI)   | Clone <i>ungD2</i>                     |
| ACGATCAGTCTTTCTTATCCAACG       | GC GGATCC ( <i>Bam</i> HI)   |                                        |
| GTCAAATAAAAACGCACGTGTTAG       |                              | Detect <i>ungD2</i> deletion           |
| AACGTTTCAAGTTACACGAACAAA       |                              |                                        |
| AAAAAGAAAGATGACAAGCTCCCTAT     |                              | PSH promoter orientation               |
| TGGGATCCTCCTGTCACACGCACGCTG    |                              |                                        |
